# Supplementary material for: Ionospheric signatures of a Bursty Bulk Flow in the 6D Vlasiator simulation
Source: Copernicus journal article supplement (doi:10.5194/angeo-43-723-2025), 2025-11-25
Supplement: Supplementary file [file angeo-43-723-2025-supplement-title-page.pdf › angeo-43-723-2025-supplement-title-page.pdf]

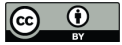

*Supplement of*

## **Ionospheric signatures of a Bursty Bulk Flow in the 6D Vlasiator simulation**

**Abiyot Workayehu et al.**

*Correspondence to:* Abiyot Workayehu ([abiyot.workayehu@helsinki.fi](mailto:abiyot.workayehu@helsinki.fi))

- [angeo-43-723-2025-supplement-title-page.pdf](#)
- [Movie\\_S1.mov](#)
- [Movie\\_S2.mov](#)
- [Supplementary Information\\_Vlasiator\\_BBF\\_Ionospheric\\_signatures.pdf](#)

The copyright of individual parts of the supplement might differ from the article licence.
